# Supplementary material for: Structure sensitivity of the electrochemical hydrogenation of cis,cis-muconic acid to hexenedioic acid and adipic acid
Source: Royal Society of Chemistry journal article supplement (doi:10.1039/d3gc03021k), 2023-12-29
Supplement: d3gc03021k1.pdf [file d3gc03021k1.pdf]

## Supplementary Information

### Structure Sensitivity of the Electrochemical Hydrogenation of *cis,cis*-Muconic Acid to Hexenedioic Acid and Adipic Acid

Deep M. Patel,<sup>a,b,†</sup> Prathamesh T. Prabhu,<sup>a,b,‡</sup> Geet Gupta,<sup>a,b</sup> Marco Nazareno Dell'Anna,<sup>a,b</sup> Samantha Kling,<sup>a,b</sup> Huy T. Nguyen,<sup>a,b</sup> Jean-Philippe Tessonier,<sup>\*a,b</sup> and Luke T. Roling<sup>\*a,b</sup>

<sup>a</sup> Department of Chemical and Biological Engineering,  
Iowa State University, Ames, IA 50011, USA.

<sup>b</sup> Center for Biorenewable Chemicals (CBiRC), Ames, IA 50011, USA.

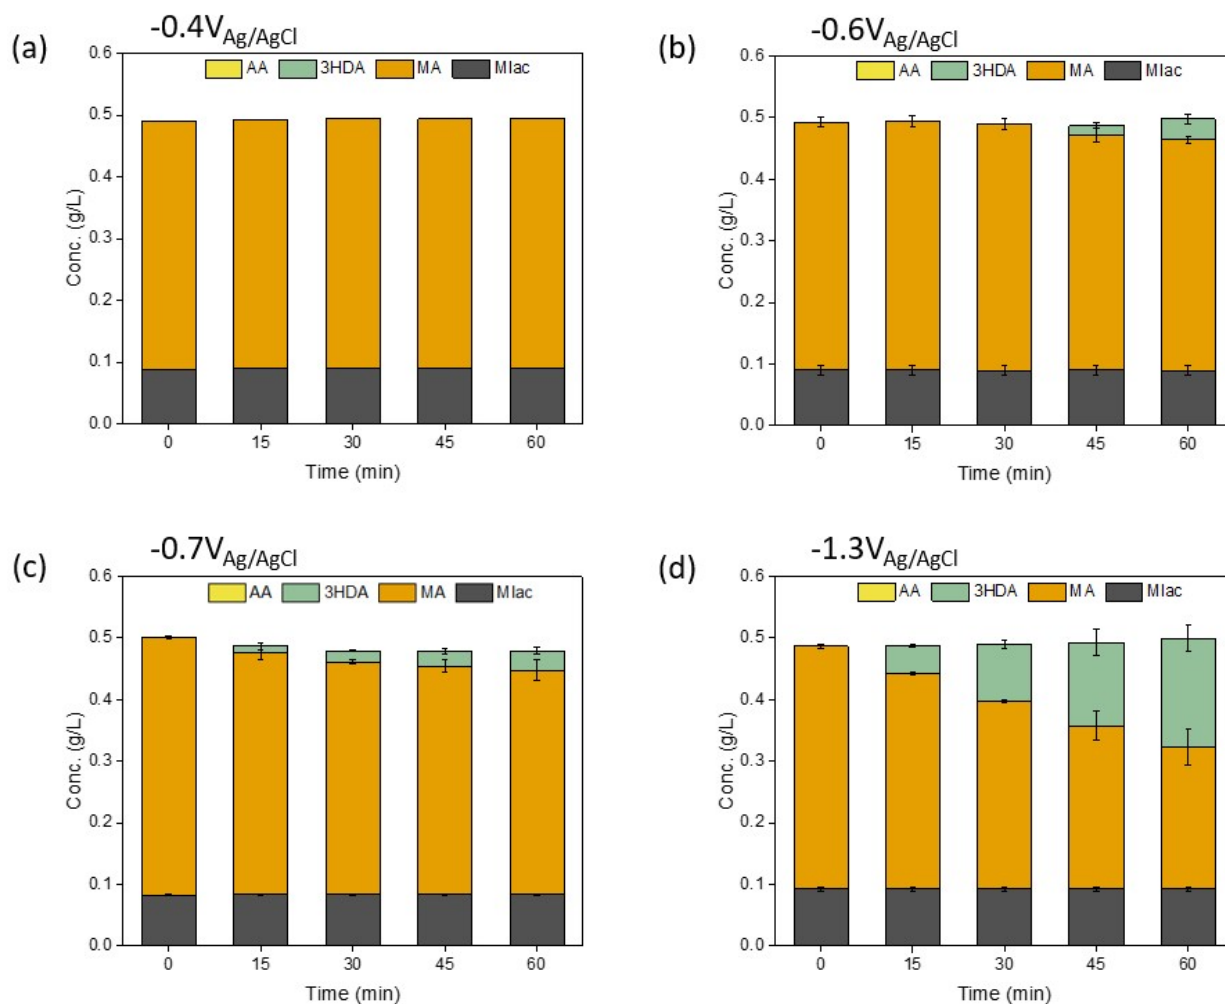

**Fig. S1** Concentration (g/L) of reactants and products in solution during chronoamperometry (CA) experiments performed for 1 hour on Pt foil at respective potentials. The error bars represent standard error from triplicates. Notation: muconic acid (MA), *trans*-3-hexenedioic acid (3HDA), muconolactone (Mlac).

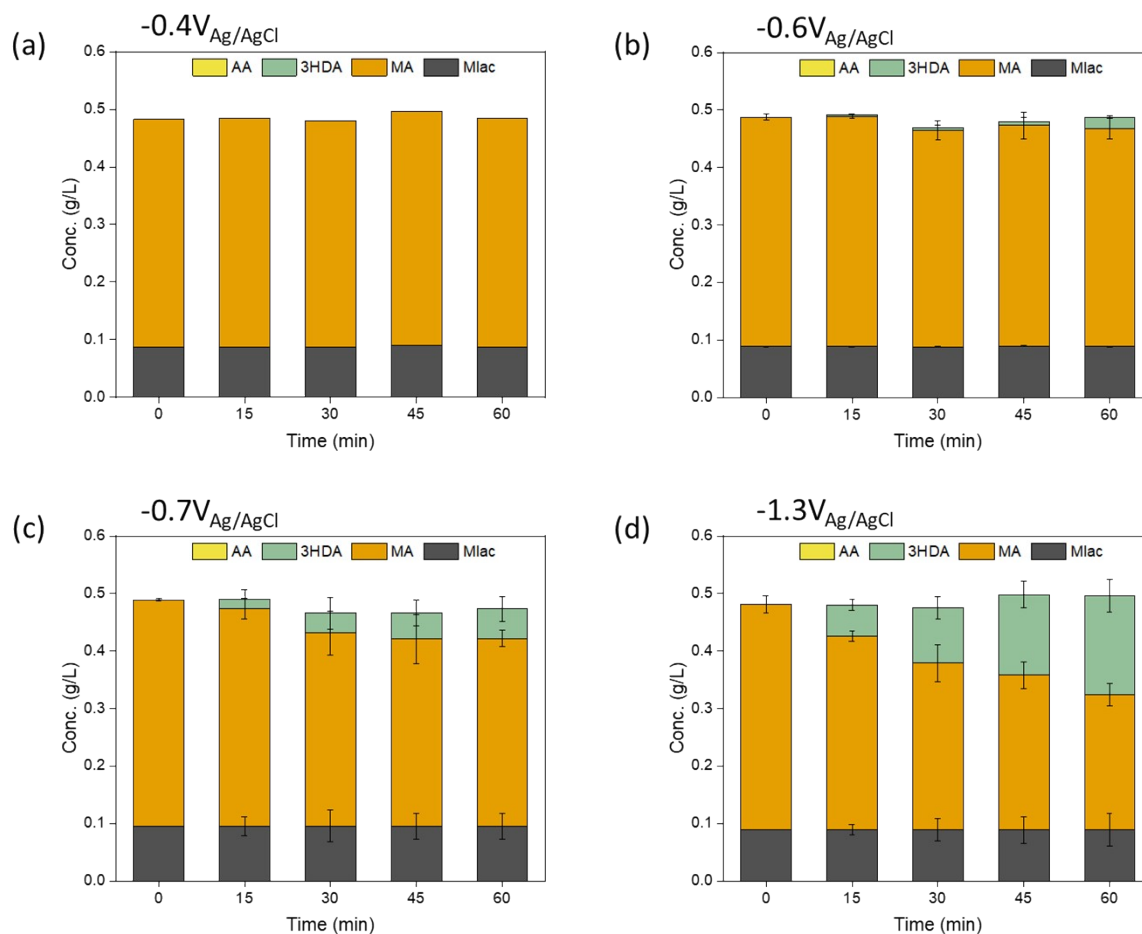

**Fig. S2** Concentration (g/L) of reactants and products in solution during chronoamperometry (CA) experiments performed for 1 hour on Pd foil at respective potentials. The error bars represent standard error from triplicates. Notation: *cis,cis*-muconic acid (*ccMA*), *trans*-3-hexenedioic acid (3HDA), muconolactone (Mlac).

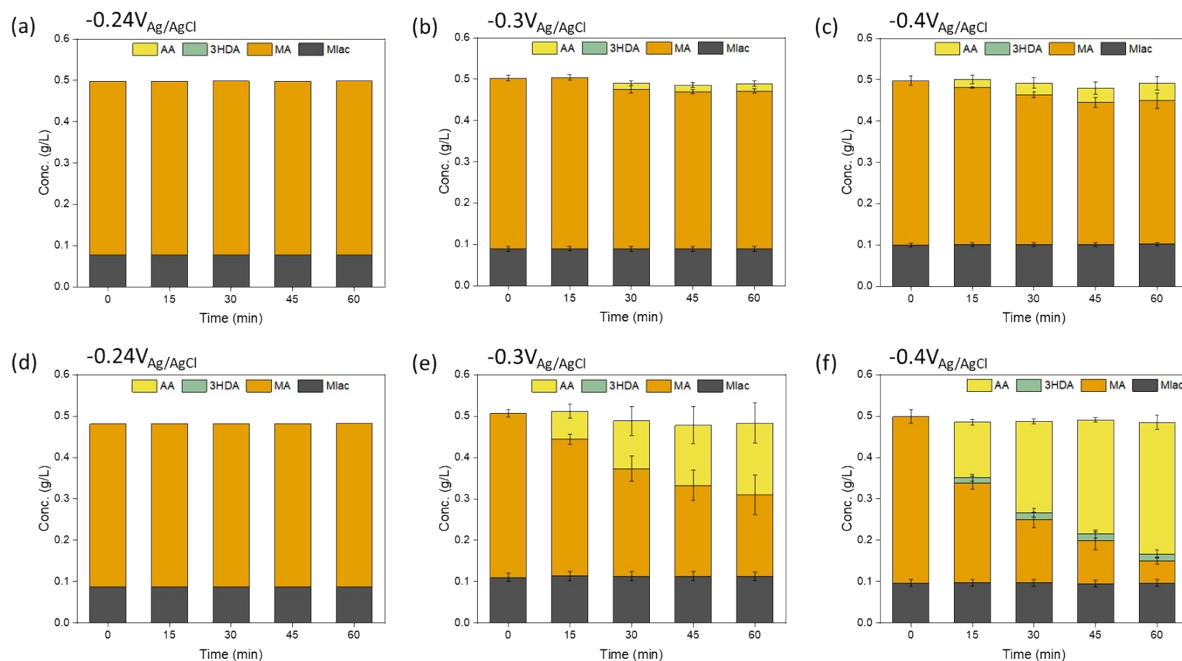

**Fig. S3** Concentration (g/L) of reactants and products in solution during chronoamperometry (CA) experiments performed for 1 hour at respective potentials on 1 mg of (a)-(c) Pt/C, and (d)-(f) Pd/C. The error bars represent standard error from triplicates. Notation: muconic acid (MA), *trans*-3-hexenedioic acid (3HDA), adipic acid (AA), muconolactone (Mlac).

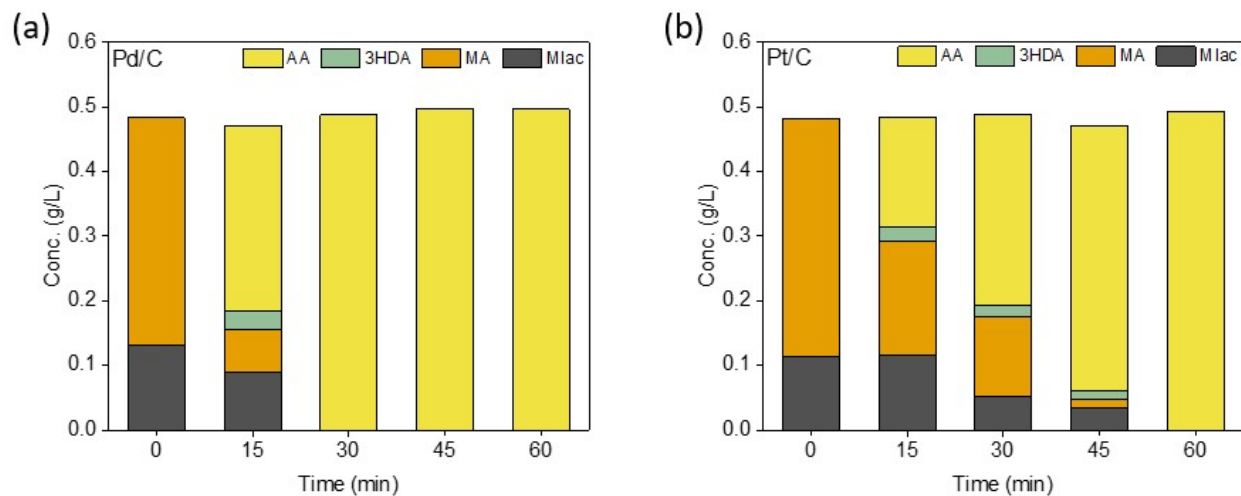

**Fig. S4** Concentration (g/L) of reactants and products in solution during chronoamperometry (CA) experiments performed for 1 hour at  $-0.4 V_{Ag/AgCl}$  on 10 mg of (a) Pd/C, and (b) Pt/C. Notation: muconic acid (MA), *trans*-3-hexenedioic acid (3HDA), muconolactone (Mlac), and adipic acid (AA).

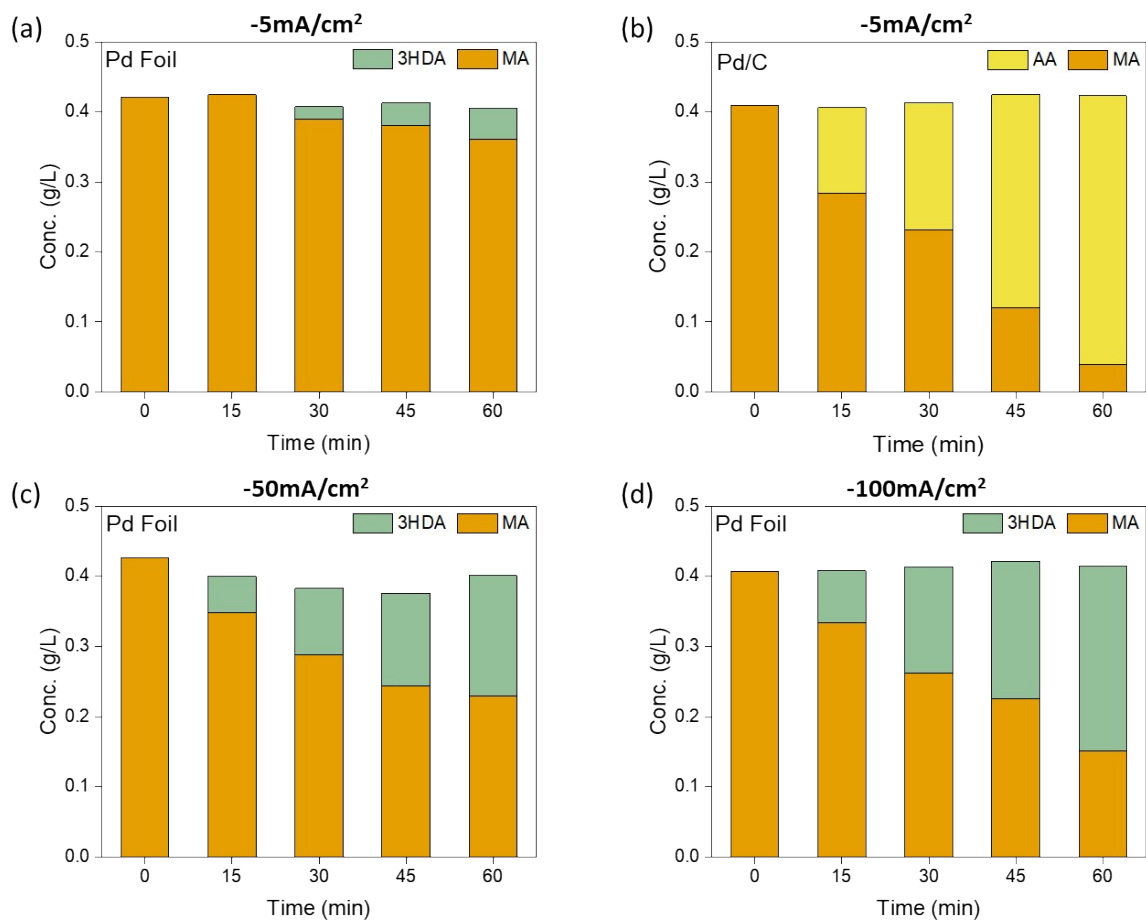

**Fig. S5** Concentration (g/L) of reactants and products in solution during chronopotentiometry (CP) experiments performed for 1 hour at respective current densities on (a),(c),(d) Pd foil, and (b) Pd/C. Notation: muconic acid (MA), *trans*-3-hexenedioic acid (3HDA), and adipic acid (AA).

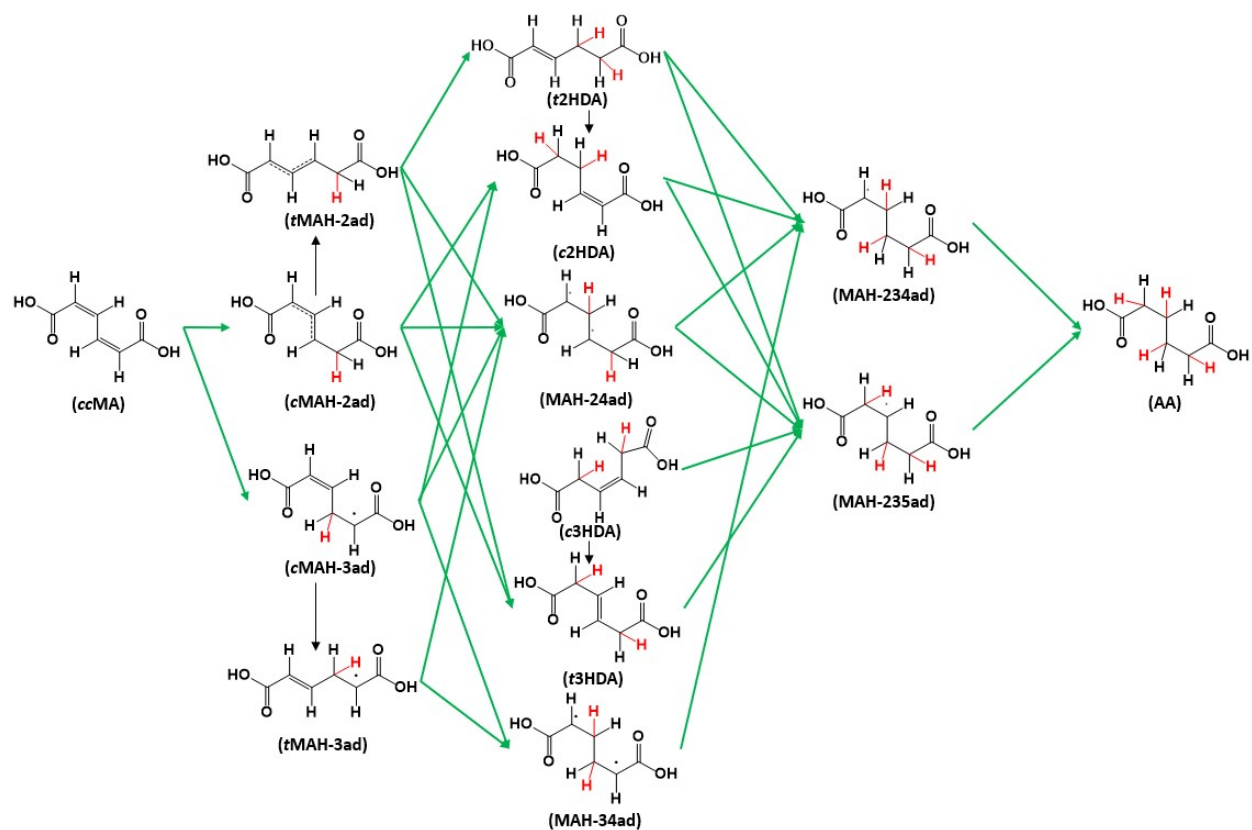

**Fig. S6** Reaction network showing all the elementary steps considered for electrochemical hydrogenation of *cis,cis*-muconic acid (*ccMA*) to *trans*-2-hexenedioic acid (*t2HDA*), *trans*-3-hexenedioic acid (*t3HDA*), and adipic acid (*AA*) on (111) and (533) surfaces of Pd and Pt, and in solution. Green arrows denote electrochemical steps and black arrows denote non-electrochemical steps.

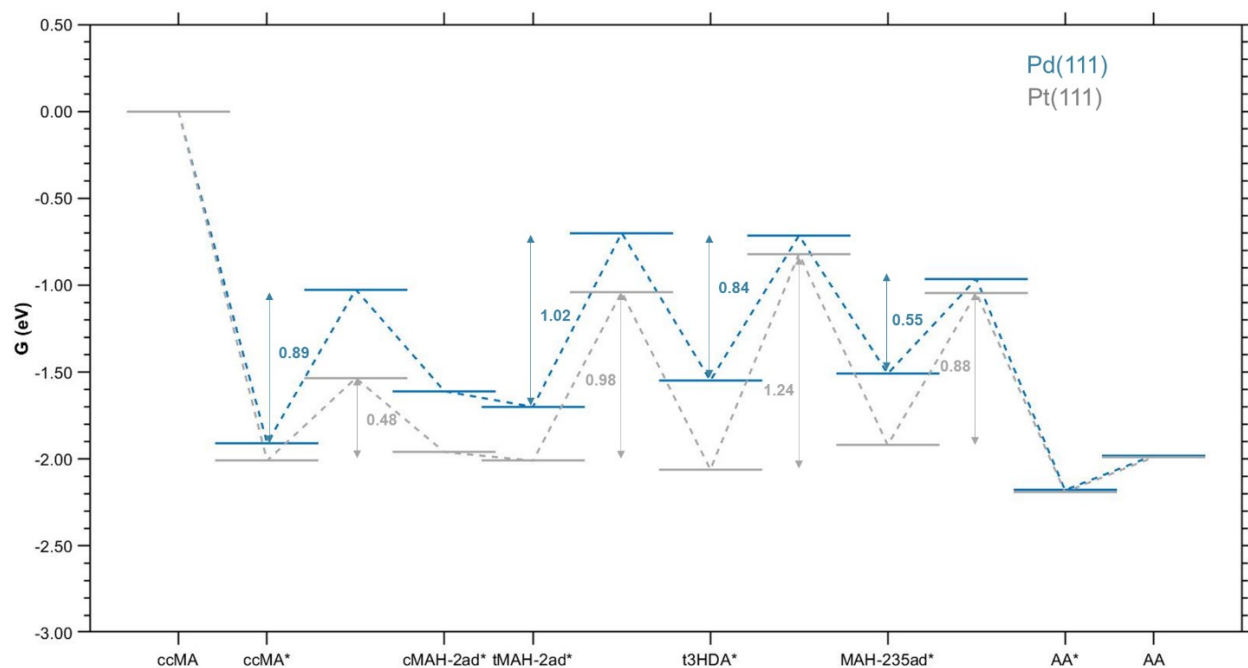

**Fig. S7** Free energy ( $G$ , eV) diagram for the  $ccMA^* \rightarrow t3HDA^* \rightarrow AA^*$  pathway on Pd(111) and Pt(111) surfaces at 0.00  $V_{RHE}$ , pH 0, and 298 K. Notation: *cis,cis*-muconic acid (*ccMA*), *trans*-3-hexenedioic acid (*t3HDA*), adipic acid (*AA*). Here, “\*” denotes adsorbed species.



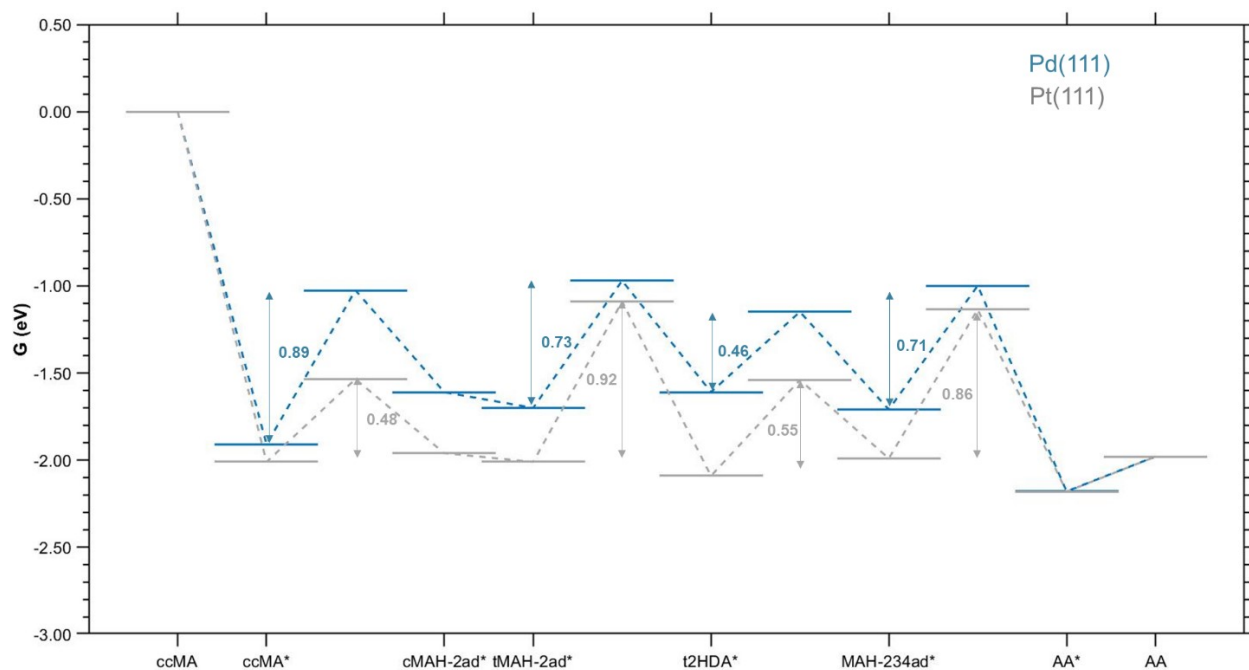

**Fig. S8** Free energy (G, eV) diagram for the  $ccMA^* \rightarrow t2HDA^* \rightarrow AA^*$  pathway on Pd(111) and Pt(111) surfaces at 0.00  $V_{RHE}$ , pH 0, and 298 K. Notation: *cis,cis*-muconic acid (*ccMA*), *trans*-2-hexenedioic acid (*t2HDA*), adipic acid (*AA*). Here, “\*” denotes adsorbed species.

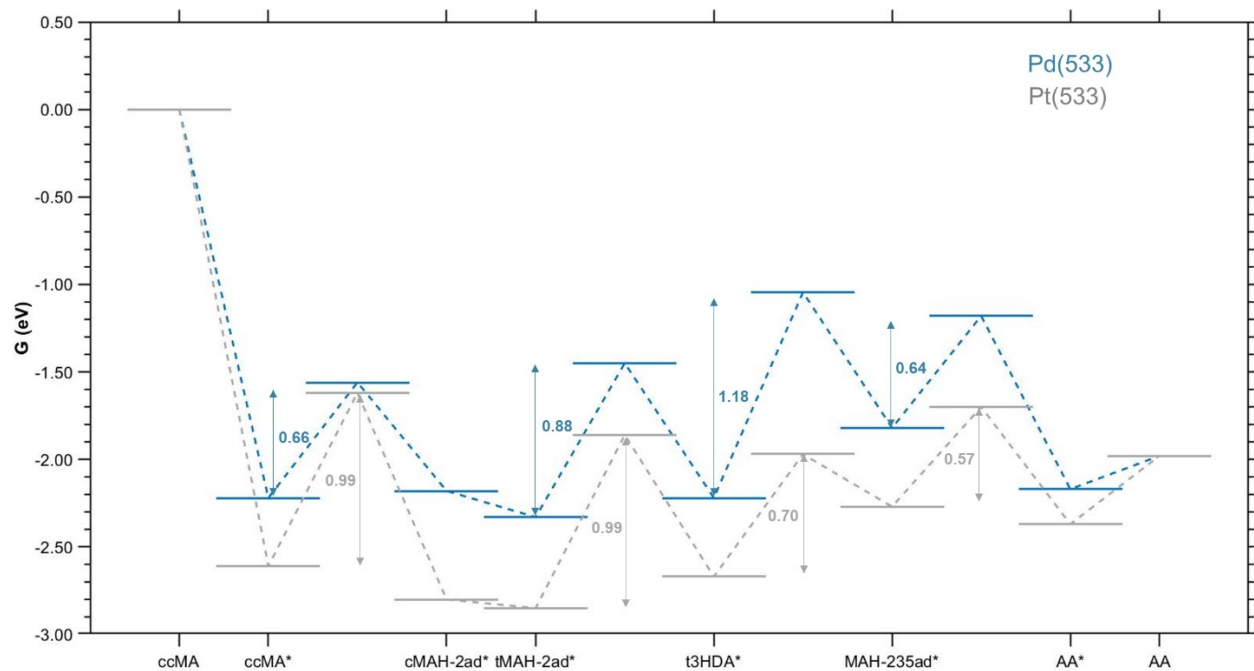

**Fig. S9** Free energy (*G*, eV) diagram for *ccMA*\* → *t3HDA*\* → *AA*\* pathway on Pd(533) and Pt(533) surfaces at 0.00 *V*<sub>RHE</sub>, pH 0, and 298 K. Notation: *cis,cis*-muconic acid (*ccMA*), *trans*-3-hexenedioic acid (*t3HDA*), adipic acid (*AA*). Here, “\*” denotes adsorbed species.

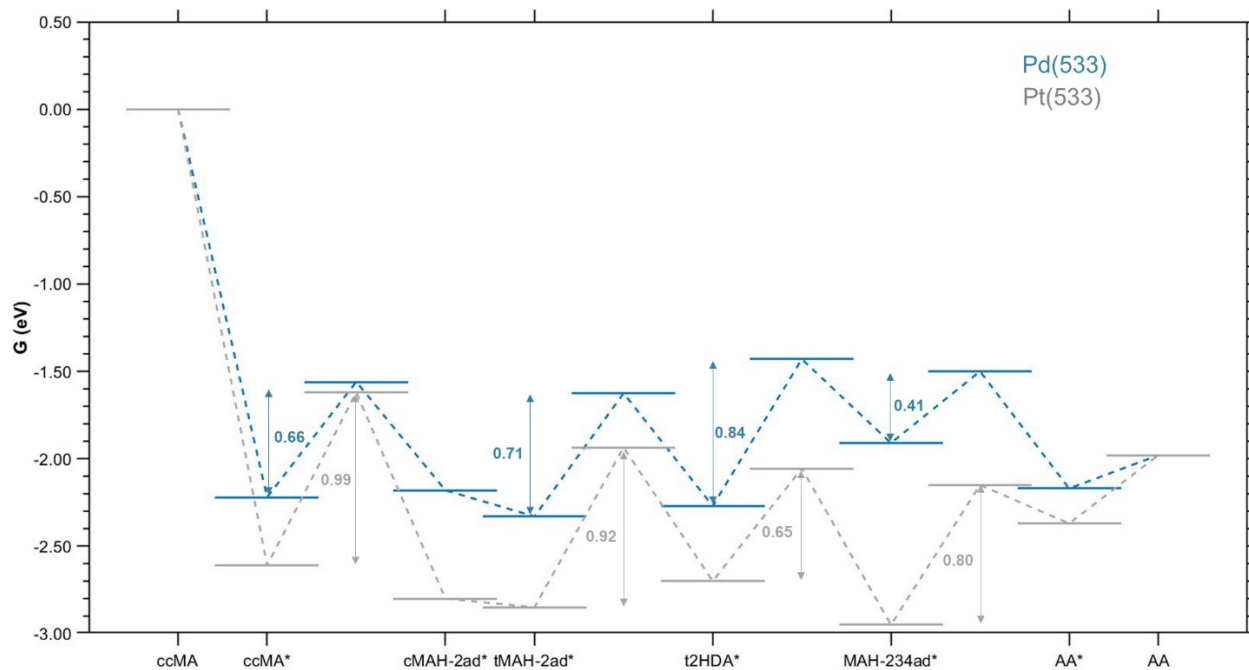

**Fig. S10** Free energy (G, eV) diagram for  $ccMA^* \rightarrow t2HDA^* \rightarrow AA^*$  pathway on Pd(533) and Pt(533) surfaces at 0.00  $V_{RHE}$ , pH 0, and 298 K. Notation: *cis,cis*-muconic acid (*ccMA*), *trans*-2-hexenedioic acid (*t2HDA*), adipic acid (*AA*). Here, “\*” denotes adsorbed species.

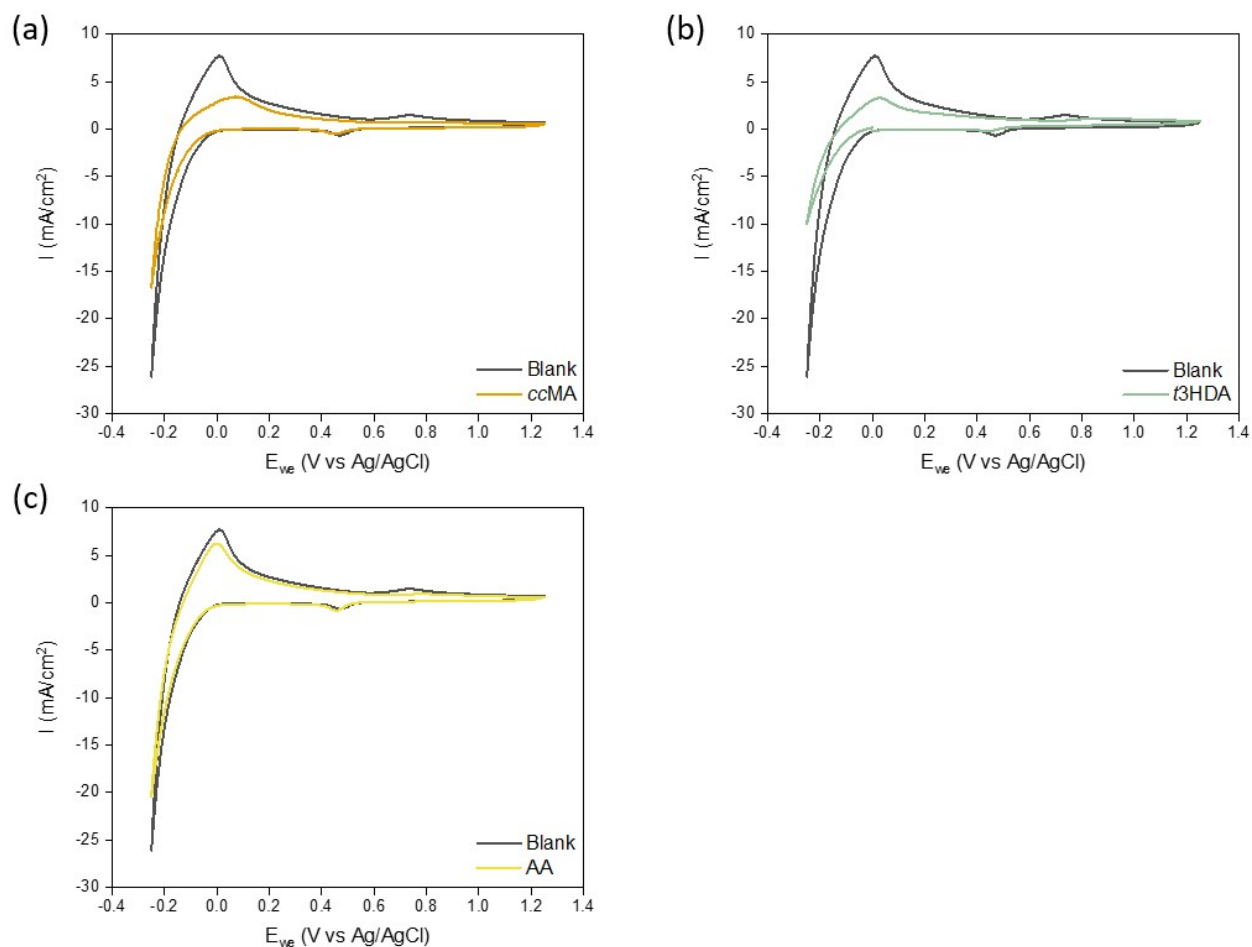

**Fig. S11** Cyclic voltammograms for model solutions containing (a) *ccMA*, (b) *t3HDA*, and (c) *AA*, along with 0.1 M  $\text{H}_2\text{SO}_4$  (blank) solution reference on polycrystalline Pd foil. Notation: *cis,cis*-muconic acid (*ccMA*), *trans*-3-hexenedioic acid (*t3HDA*), adipic acid (*AA*). Peak at  $\sim 0.6$   $V_{\text{Ag/AgCl}}$  is characteristic for  $\text{PdO}_x$  reduction, and those in the range of 0.0 to  $-0.2$   $V_{\text{Ag/AgCl}}$  are characteristic peaks for  $\text{H}^*$  adsorption/desorption. The scan rate for obtaining CVs was set to 50 mV/sec.

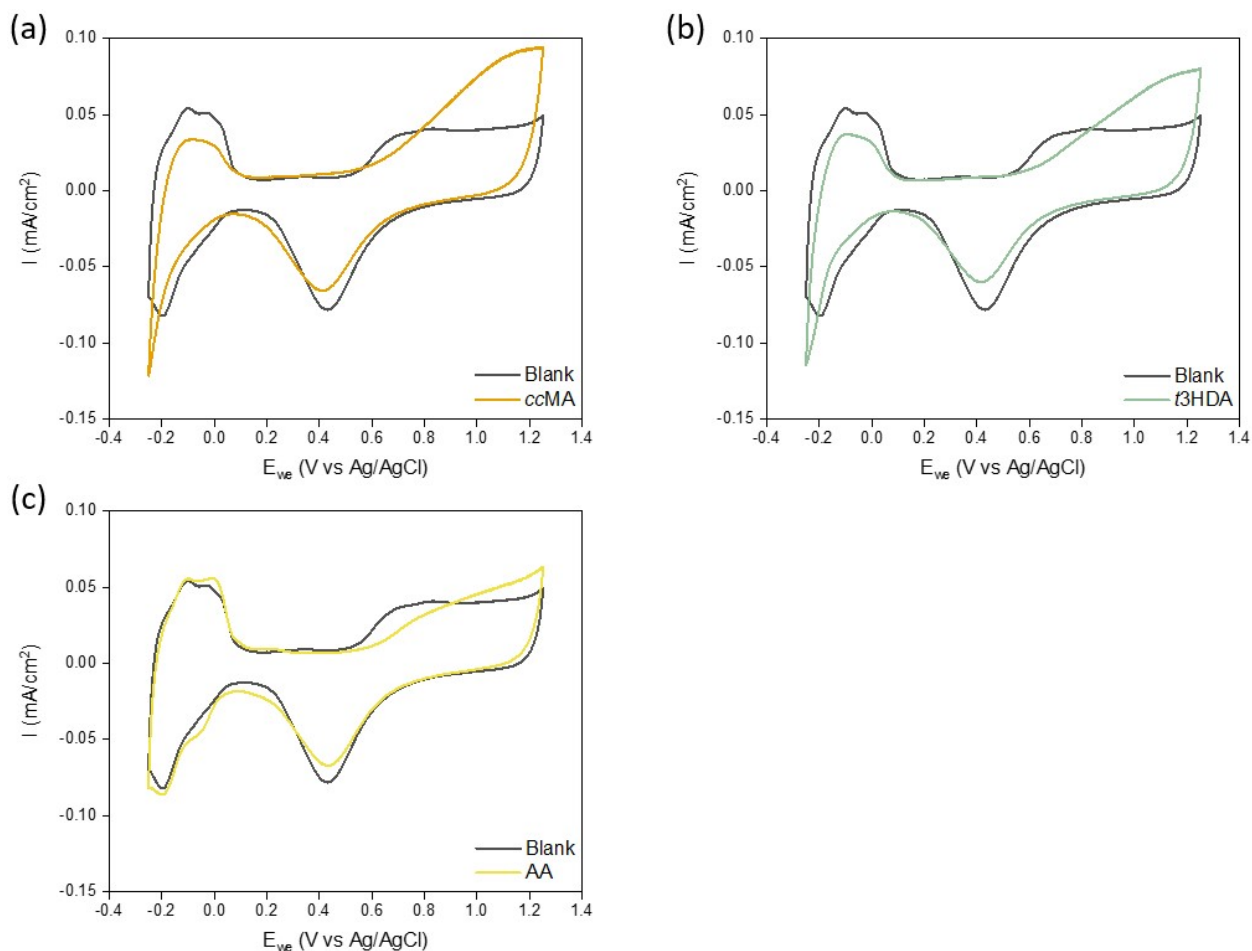

**Fig. S12** Cyclic voltammograms for model solutions containing (a) *cc*MA, (b) *t*3HDA, and (c) AA, along with 0.1 M H<sub>2</sub>SO<sub>4</sub> (blank) solution reference on Pt/C. Notation: *cis,cis*-muconic acid (*cc*MA), *trans*-3-hexenedioic acid (*t*3HDA), adipic acid (AA). Peak at ~ 0.4 V<sub>Ag/AgCl</sub> is characteristic for PtO<sub>x</sub> reduction, and those in the range of 0.0 to -0.2 V<sub>Ag/AgCl</sub> are characteristic peaks for H<sup>+</sup> adsorption/desorption. The scan rate for obtaining CVs was set to 50 mV/sec.

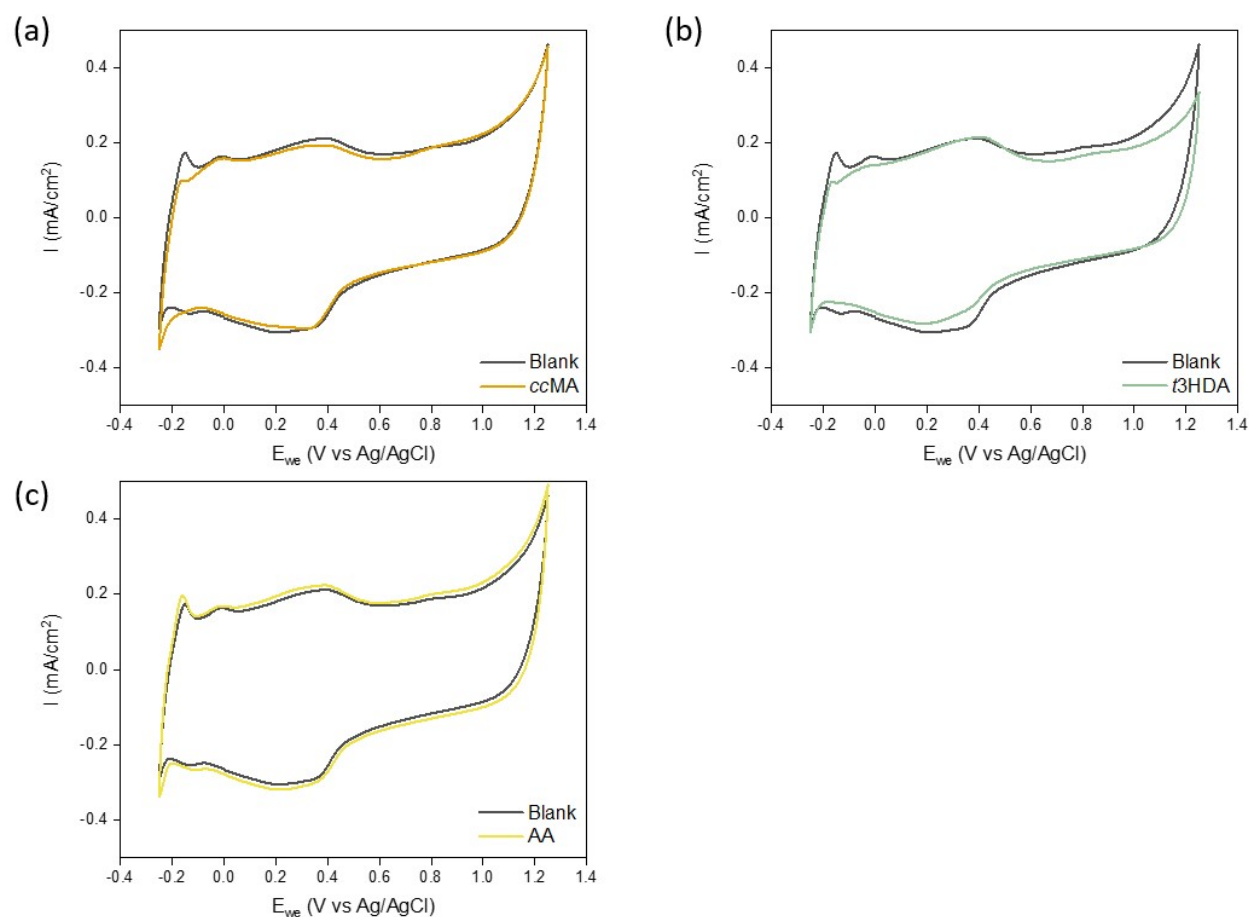

**Fig. S13** Cyclic voltammograms for model solutions containing (a) *cc*MA, (b) *t*3HDA, and (c) AA, along with 0.1 M H<sub>2</sub>SO<sub>4</sub> (blank) solution reference on Pd/C. Notation: *cis,cis*-muconic acid (*cc*MA), *trans*-3-hexenedioic acid (*t*3HDA), adipic acid (AA). Peak at  $\sim 0.4$  V<sub>Ag/AgCl</sub> is characteristic for PdO<sub>x</sub> reduction, and those in the range of 0.0 to -0.2 V<sub>Ag/AgCl</sub> are characteristic peaks for H\* adsorption/desorption. The scan rate for obtaining CVs was set to 50 mV/sec.

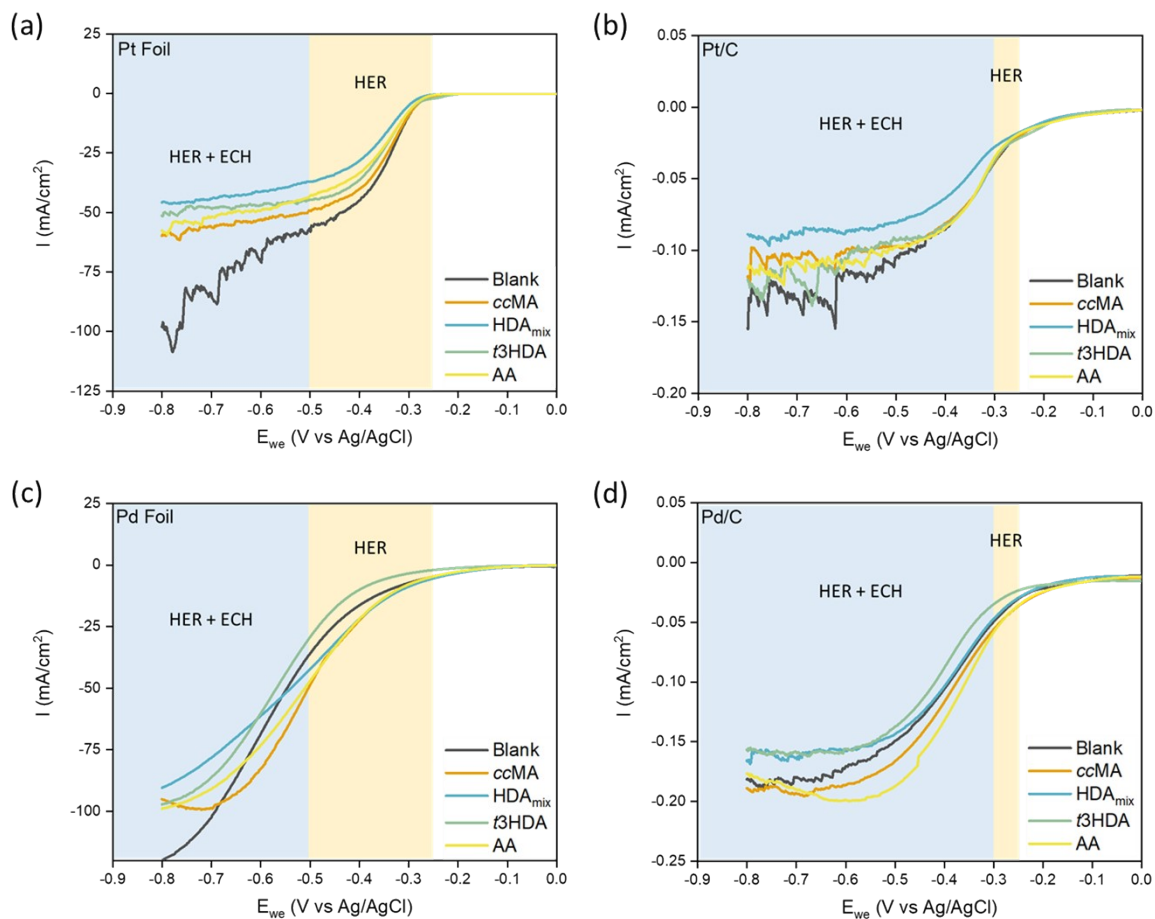

**Fig. S14** Linear sweep voltammograms for respective model solutions on (a) Pt foil, (b) Pt/C, (c) Pd foil, and (d) Pd/C at pH 1. The sweep rate was set to 50 mV/sec. The regions in the LSVs are bifurcated based on chronoamperometry experiments in Fig. S1-S3, Fig. S7, and CVs in Fig. S8-S11. Notation: *cis,cis*-muconic acid (*ccMA*), *trans*-3-hexenedioic acid (*t3HDA*), adipic acid (*AA*).

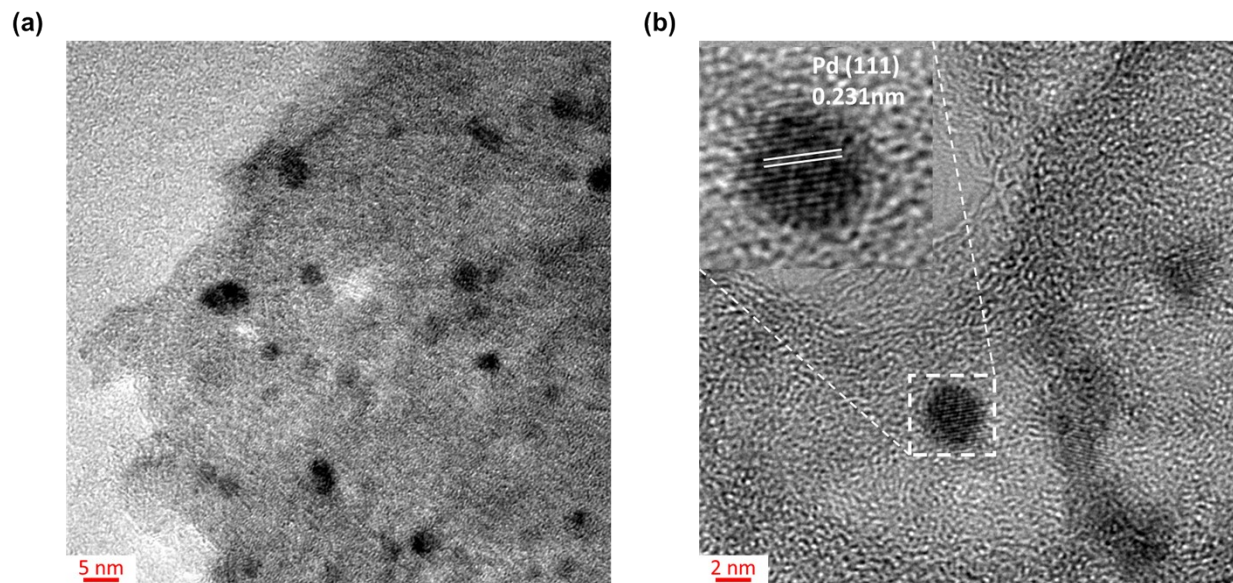

**Fig. S15** High resolution transmission electron microscopy (HR-TEM) image of the fresh commercial 5 wt.% Pd/C catalyst (average particle size: 3 nm) at (a) 410 kx, and (b) 450 kx magnifications. The zoom-in inset image in (b) shows the d-spacing in the Pd lattice, which corresponds to the (111) facet of Pd.



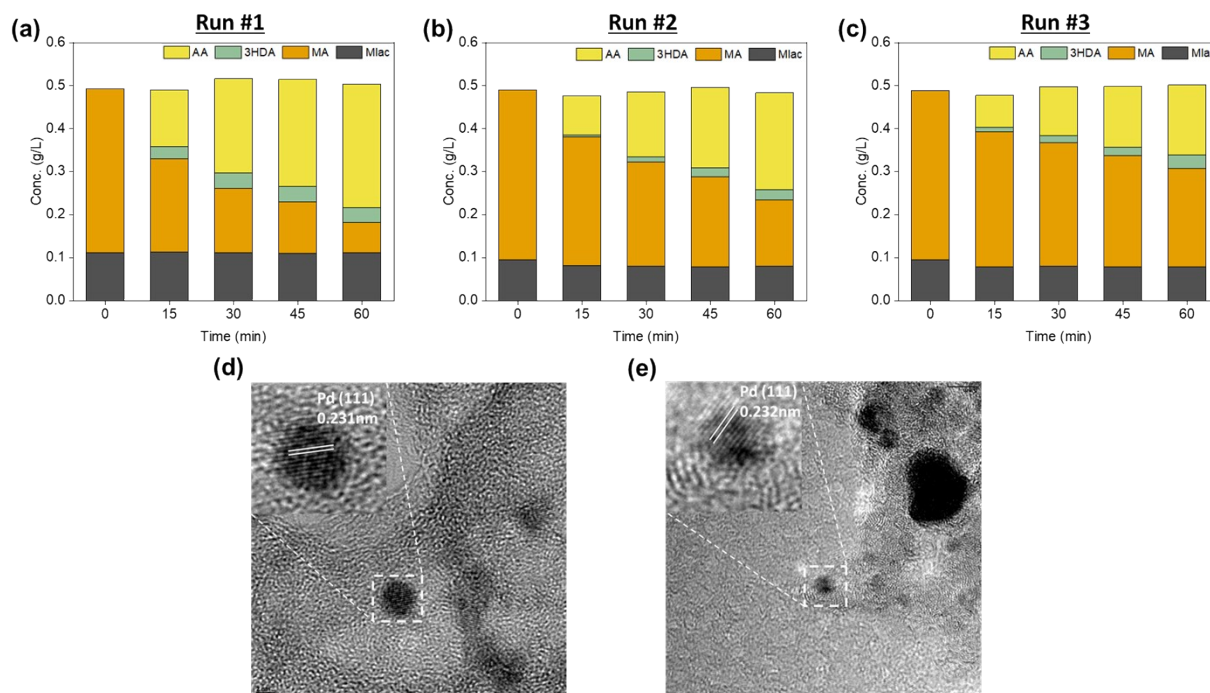

**Fig. S16** (a)-(c) Concentration (g/L) of reactants and products vs. time (min) for three consecutive cycles of chronoamperometry (CA) experiments at  $-0.40 V_{Ag/AgCl}$ , pH 1 on Pd/C. (d) HR-TEM image of fresh Pd/C sample. (e) HR-TEM image of spent Pd/C sample.

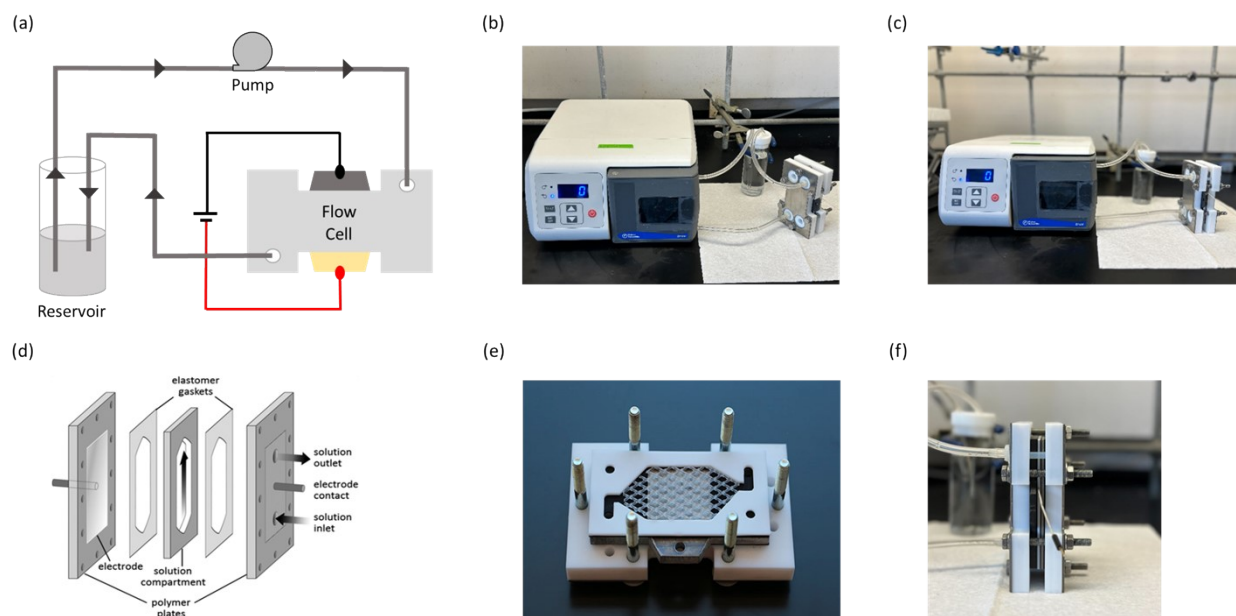

**Fig. S17** (a) Schematic and (b)-(c) photographs of the experimental setup used in this study. (d) Schematic of the single-compartment electrochemical flow cell used in this study.<sup>1</sup> (e) Top view and (f) side view photographs of the single-compartment electrochemical flow cell.

**Table S1.** Calculated free energies ( $G_{A^*}$ , eV) of reaction intermediates adsorbed on (111) and (533) surfaces of Pd and Pt at 298 K. All values are referenced to the clean surfaces,  $ccMA_{(g)}$ , and  $H_{2(g)}$  at 298 K and 1 atm.

| Chemical species              | Pd(111) | Pt(111) | Pd(533) | Pt(533) |
|-------------------------------|---------|---------|---------|---------|
| $ccMA^*$                      | -1.91   | -2.01   | -2.22   | -2.61   |
| $cMAH-2ad^*$                  | -1.61   | -1.96   | -2.19   | -2.81   |
| $tMAH-2ad^*$                  | -1.70   | -2.01   | -2.34   | -2.86   |
| $cMAH-3ad^*$                  | -1.41   | -1.93   | -2.03   | -2.88   |
| $tMAH-3ad^*$                  | -1.50   | -2.13   | -2.17   | -2.82   |
| $cMAH-23ad^*$ (or $c2HDA^*$ ) | -1.50   | -1.91   | -2.18   | -2.36   |
| $tMAH-23ad^*$ (or $t2HDA^*$ ) | -1.61   | -2.10   | -2.28   | -2.71   |
| $MAH-24ad^*$                  | -1.18   | -2.15   | -1.91   | -2.59   |
| $cMAH-25ad^*$ (or $c3HDA^*$ ) | -1.45   | -1.89   | -2.16   | -2.59   |
| $tMAH-25ad^*$ (or $t3HDA^*$ ) | -1.54   | -2.07   | -2.23   | -2.68   |
| $MAH-34ad^*$                  | -1.35   | -1.76   | -1.98   | -2.89   |
| $MAH-234ad^*$                 | -1.71   | -2.00   | -1.92   | -2.96   |
| $MAH-235ad^*$                 | -1.50   | -1.92   | -1.83   | -2.28   |
| $AA^*$                        | -2.18   | -2.19   | -2.18   | -2.39   |
| $H^*$                         | -0.40   | -0.32   | -0.43   | -0.58   |

**Table S2.** Calculated zero-point energies, entropies, and free energies of reaction intermediates in the solution phase at 298 K. Free energies are referenced to isolated  $ccMA$  and  $H_2$  (ZPE: 0.27 eV, S: 130.3 J/(mol\*K)) in implicit water at 298 K.

| Chemical species          | ZPE (eV) | S (J/(mol*K)) | G (eV) |
|---------------------------|----------|---------------|--------|
| $ccMA$                    | 3.14     | 416.6         | 0.00   |
| $cMAH-2ad$                | 3.38     | 441.3         | 0.22   |
| $cMAH-3ad$                | 3.38     | 451.6         | 0.72   |
| $tMAH-2ad$                | 3.36     | 444.2         | 0.11   |
| $tMAH-23ad$ (or $t2HDA$ ) | 3.73     | 439.3         | -0.98  |
| $tMAH-25ad$ (or $t3HDA$ ) | 3.71     | 444.4         | -0.76  |
| $MAH-234ad$               | 3.99     | 450.0         | -0.18  |
| $MAH-235ad$               | 3.96     | 464.9         | 0.02   |
| $AA$                      | 4.36     | 450.7         | -1.80  |

**Table S3.** Calculated zero-point energies ( $ZPE_{A^*}$ , eV) of reaction intermediates adsorbed on (111) and (533) surfaces of Pd at 298 K. The values on Pt surfaces were assumed to be the same as on Pd surfaces.  $ZPE_{A^*}$  values on respective surfaces of Pt. ZPE for  $ccMA_{(g)}$  is 3.07 eV, and  $H_{2(g)}$  is 0.27 eV at 1 atm and 298 K.

| Chemical species              | Pd(111) | Pd(533) |
|-------------------------------|---------|---------|
| $ccMA^*$                      | 3.05    | 3.08    |
| $cMAH-2ad^*$                  | 3.35    | 3.37    |
| $tMAH-2ad^*$                  | 3.35    | 3.36    |
| $cMAH-3ad^*$                  | 3.35    | 3.40    |
| $tMAH-3ad^*$                  | 3.35    | 3.37    |
| $cMAH-23ad^*$ (or $c2HDA^*$ ) | 3.66    | 3.67    |
| $tMAH-23ad^*$ (or $t2HDA^*$ ) | 3.65    | 3.65    |
| $MAH-24ad^*$                  | 3.63    | 3.67    |
| $cMAH-25ad^*$ (or $c3HDA^*$ ) | 3.65    | 3.64    |
| $tMAH-25ad^*$ (or $t3HDA^*$ ) | 3.66    | 3.65    |
| $MAH-34ad^*$                  | 3.61    | 3.71    |
| $MAH-234ad^*$                 | 3.96    | 3.96    |
| $MAH-235ad^*$                 | 3.96    | 3.97    |
| $AA^*$                        | 4.27    | 4.24    |

**Table S4.** Calculated entropies ( $S_{A^*}$ , J/(mol\*K)) of reaction intermediates adsorbed on (111) and (533) surfaces of Pd at 298 K. The values on Pt surfaces were assumed to be the same as on Pd surfaces. Entropy for  $ccMA_{(g)}$  is 428.2 J/(mol\*K), and for  $H_{2(g)}$  is 134.4 J/(mol\*K) at 1 atm and 298 K.

| Chemical species              | Pd(111) | Pd(533) |
|-------------------------------|---------|---------|
| $ccMA^*$                      | 195.8   | 187.6   |
| $cMAH-2ad^*$                  | 208.8   | 203.2   |
| $tMAH-2ad^*$                  | 183.8   | 196.7   |
| $cMAH-3ad^*$                  | 190.4   | 185.6   |
| $tMAH-3ad^*$                  | 203.9   | 199.7   |
| $cMAH-23ad^*$ (or $c2HDA^*$ ) | 195.4   | 198.9   |
| $tMAH-23ad^*$ (or $t2HDA^*$ ) | 191.9   | 201.0   |
| $MAH-24ad^*$                  | 196.1   | 199.9   |
| $cMAH-25ad^*$ (or $c3HDA^*$ ) | 215.7   | 207.7   |
| $tMAH-25ad^*$ (or $t3HDA^*$ ) | 202.7   | 204.8   |
| $MAH-34ad^*$                  | 197.2   | 193.3   |
| $MAH-234ad^*$                 | 205.9   | 193.7   |
| $MAH-235ad^*$                 | 236.3   | 196.2   |
| $AA^*$                        | 241.6   | 228.4   |

**Table S5.** Calculated values of  $U_{0,RHE}$  (eV) for potential dependent correction of activation free energies for various elementary steps involved in most favorable pathways on (111) and (533) surfaces of Pd and Pt. Here, “\*” denotes adsorbed species.

| Elementary                                  | Pd(111) | Pt(111) | Pd(533) | Pt(533) |
|---------------------------------------------|---------|---------|---------|---------|
| $ccMA^* + H^* \rightarrow cMAH-2ad^*$       | -0.11   | -0.51   | 0.12    | 0.41    |
| $ccMA^* + H^* \rightarrow cMAH-3ad^*$       | 0.07    | -0.03   | 0.29    | 0.30    |
| $tMAH-2ad^* + H^* \rightarrow tMAH-23ad^*$  | 0.46    | -0.22   | 0.35    | 0.17    |
| $tMAH-2ad^* + H^* \rightarrow tMAH-25ad^*$  | 0.09    | 0.22    | 0.42    | 0.20    |
| $tMAH-23ad^* + H^* \rightarrow MAH-234ad^*$ | -0.02   | -0.60   | 0.06    | 0.29    |
| $tMAH-25ad^* + H^* \rightarrow MAH-235ad^*$ | 0.17    | -0.59   | -0.03   | 0.30    |
| $MAH-234ad^* + H^* \rightarrow AA^*$        | 0.21    | 0.15    | 0.58    | 0.02    |
| $MAH-235ad^* + H^* \rightarrow AA^*$        | -0.07   | -0.25   | 0.32    | 0.26    |

**Table S6.** Calculated activation free energies ( $G_a(U_{0,RHE})$ , eV) for various elementary steps involved in most favorable pathways on (111) and (533) surfaces of Pd and Pt without any potential dependent corrections. Here “\*” denotes adsorbed species.

| Elementary                                  | Pd(111) | Pt(111) | Pd(533) | Pt(533) |
|---------------------------------------------|---------|---------|---------|---------|
| $ccMA^* + H^* \rightarrow cMAH-2ad^*$       | 0.83    | 0.22    | 0.72    | 1.04    |
| $ccMA^* + H^* \rightarrow cMAH-3ad^*$       | 1.17    | 0.74    | 1.32    | 1.38    |
| $tMAH-2ad^* + H^* \rightarrow tMAH-23ad^*$  | 0.87    | 0.76    | 0.73    | 0.95    |
| $tMAH-2ad^* + H^* \rightarrow tMAH-25ad^*$  | 0.69    | 1.03    | 0.94    | 1.04    |
| $tMAH-23ad^* + H^* \rightarrow MAH-234ad^*$ | 0.45    | 0.25    | 0.87    | 0.79    |
| $tMAH-25ad^* + H^* \rightarrow MAH-235ad^*$ | 0.92    | 0.94    | 1.16    | 0.85    |
| $MAH-234ad^* + H^* \rightarrow AA^*$        | 0.92    | 0.86    | 0.70    | 0.81    |
| $MAH-235ad^* + H^* \rightarrow AA^*$        | 0.51    | 0.87    | 0.80    | 0.70    |

## References

- 1 D. Pletcher, R. A. Green and R. C. D. Brown, *Chem. Rev.*, 2018, **118**, 4573–4591.
